# Supplementary material for: A Mouse Model for the Metabolic Effects of the Human Fat Mass and Obesity Associated FTO Gene
Source: PubMed Central journal article supplement (PMC2719869; doi:10.1371/journal.pgen.1000599), 2009-08-14

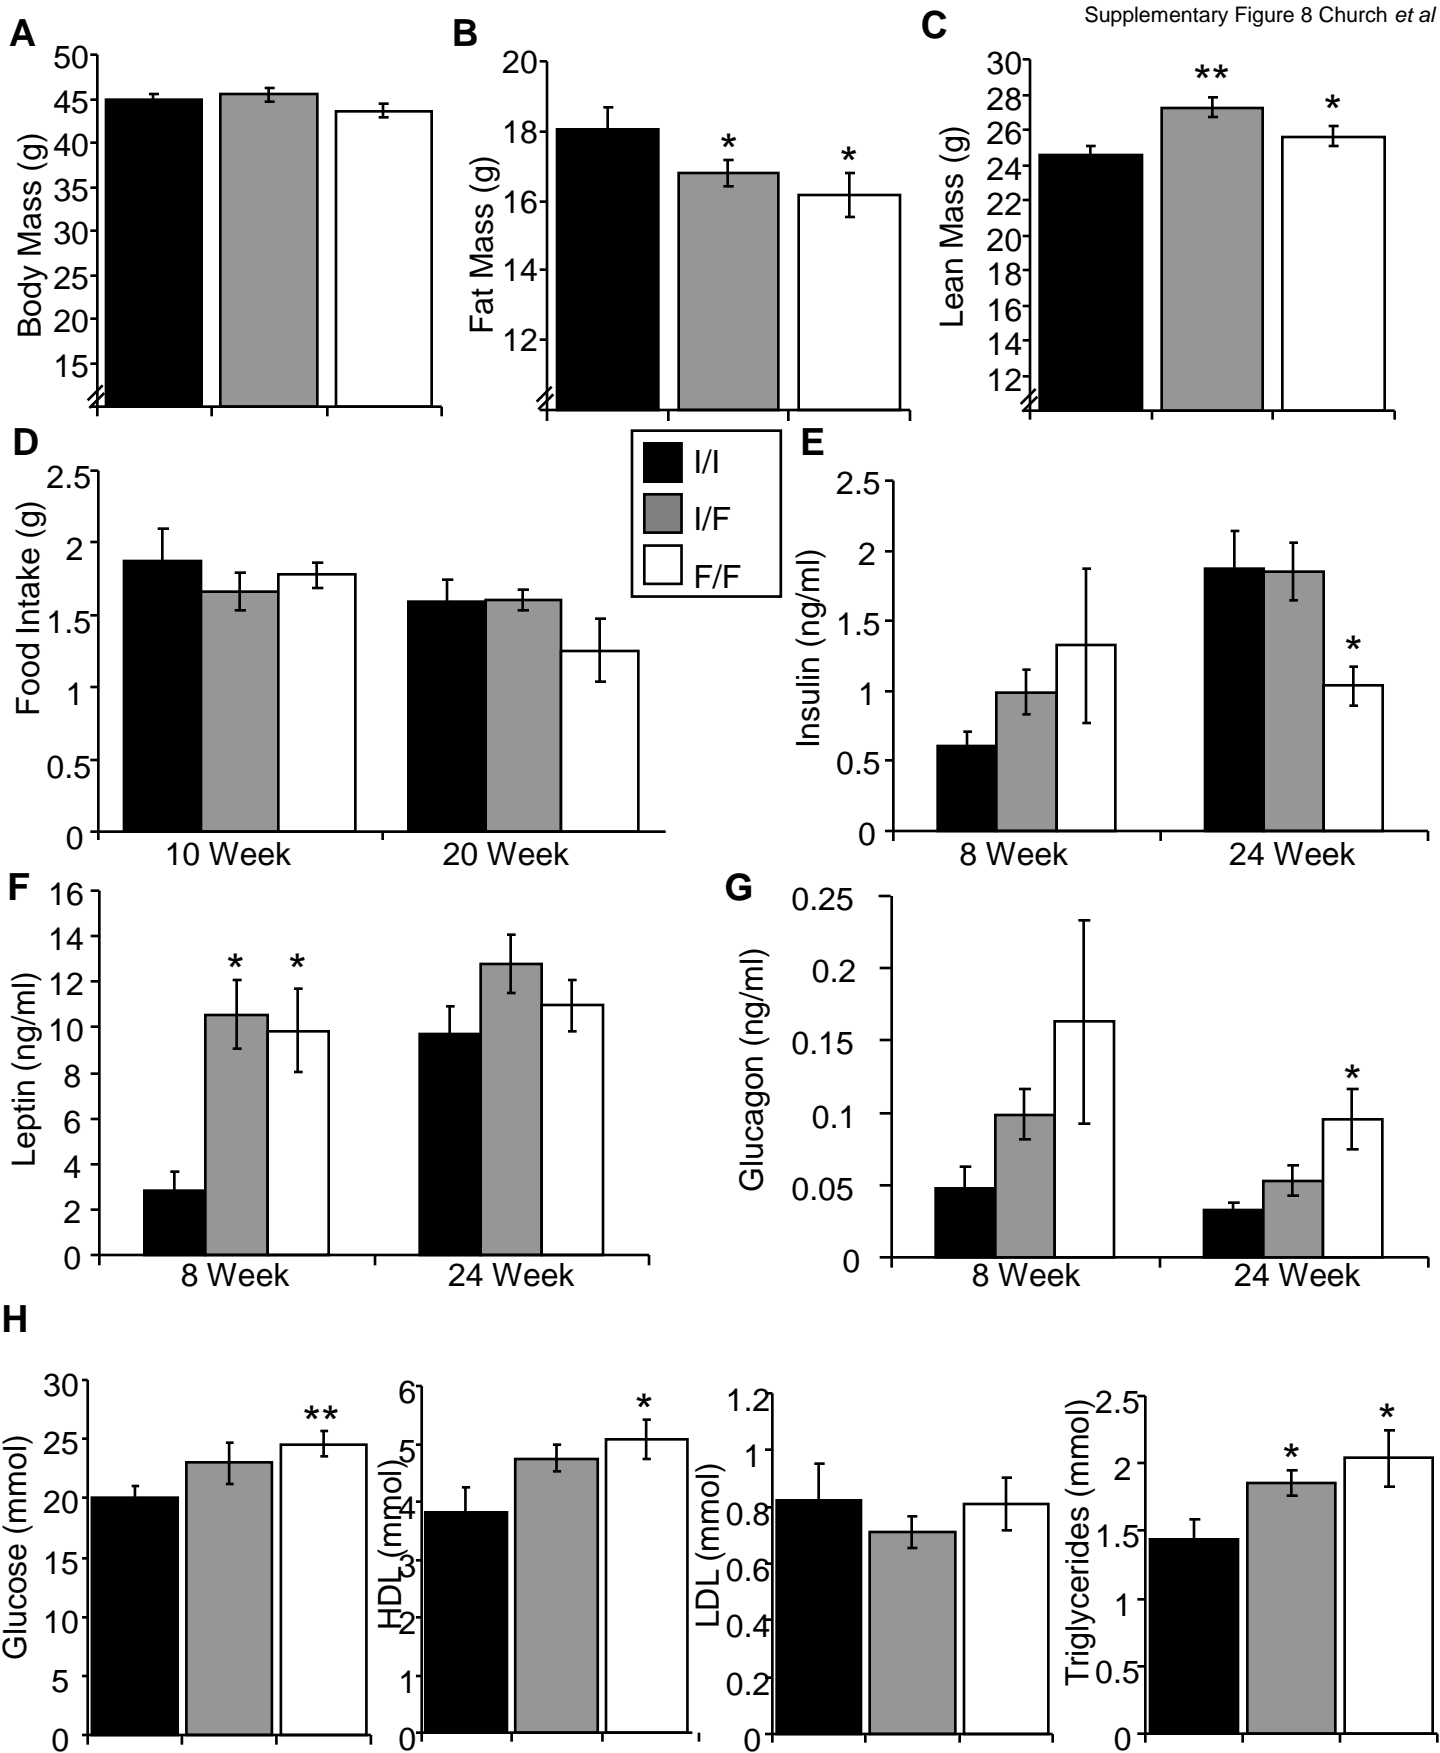

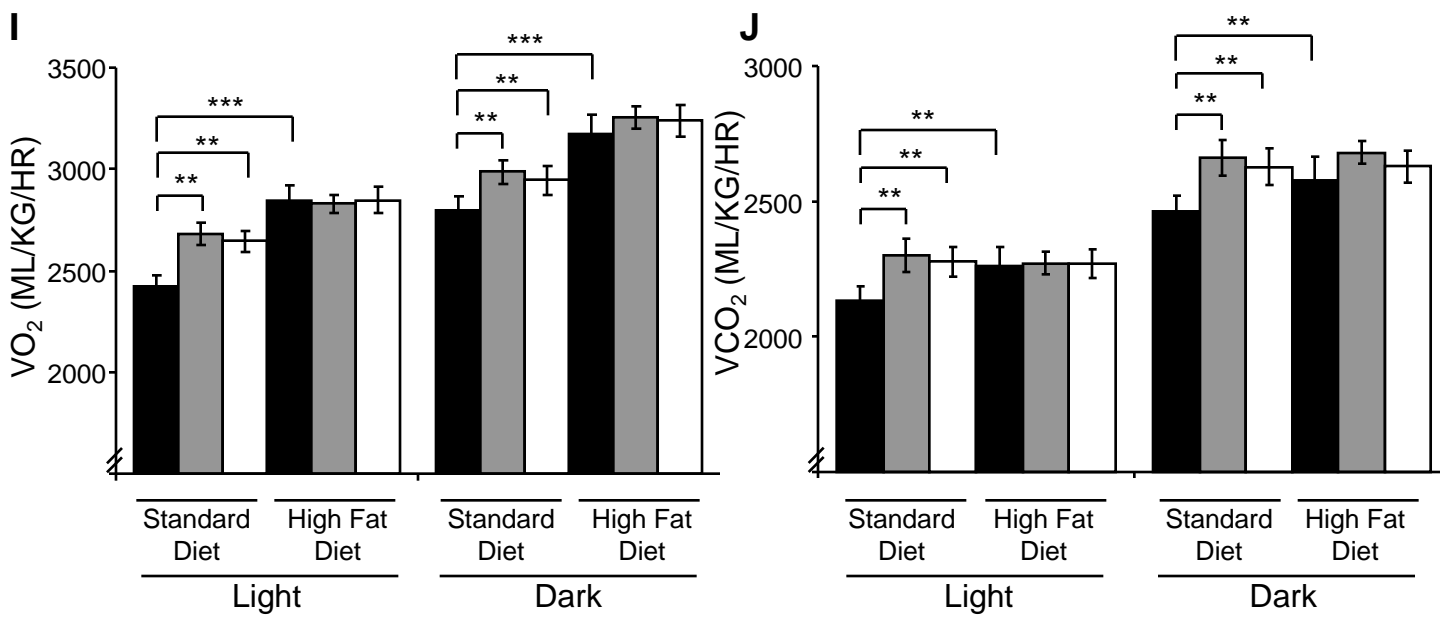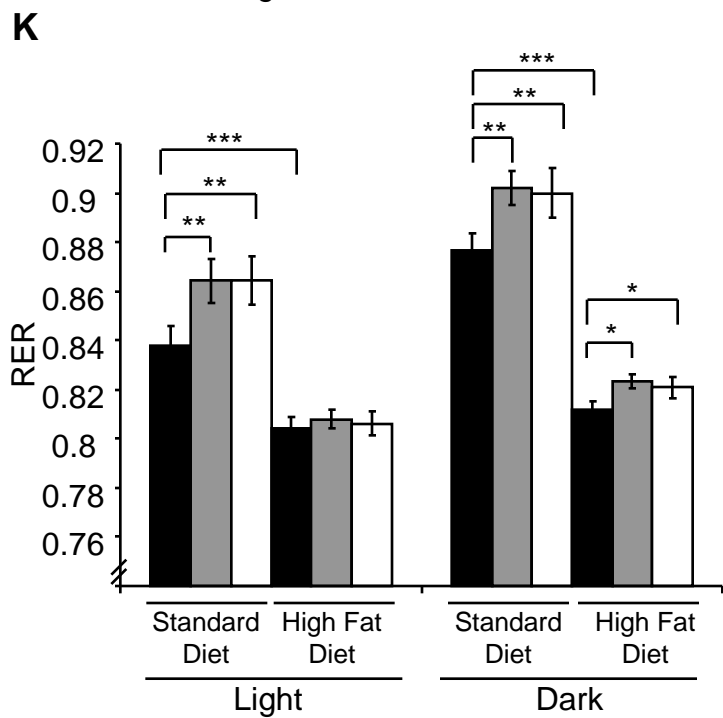

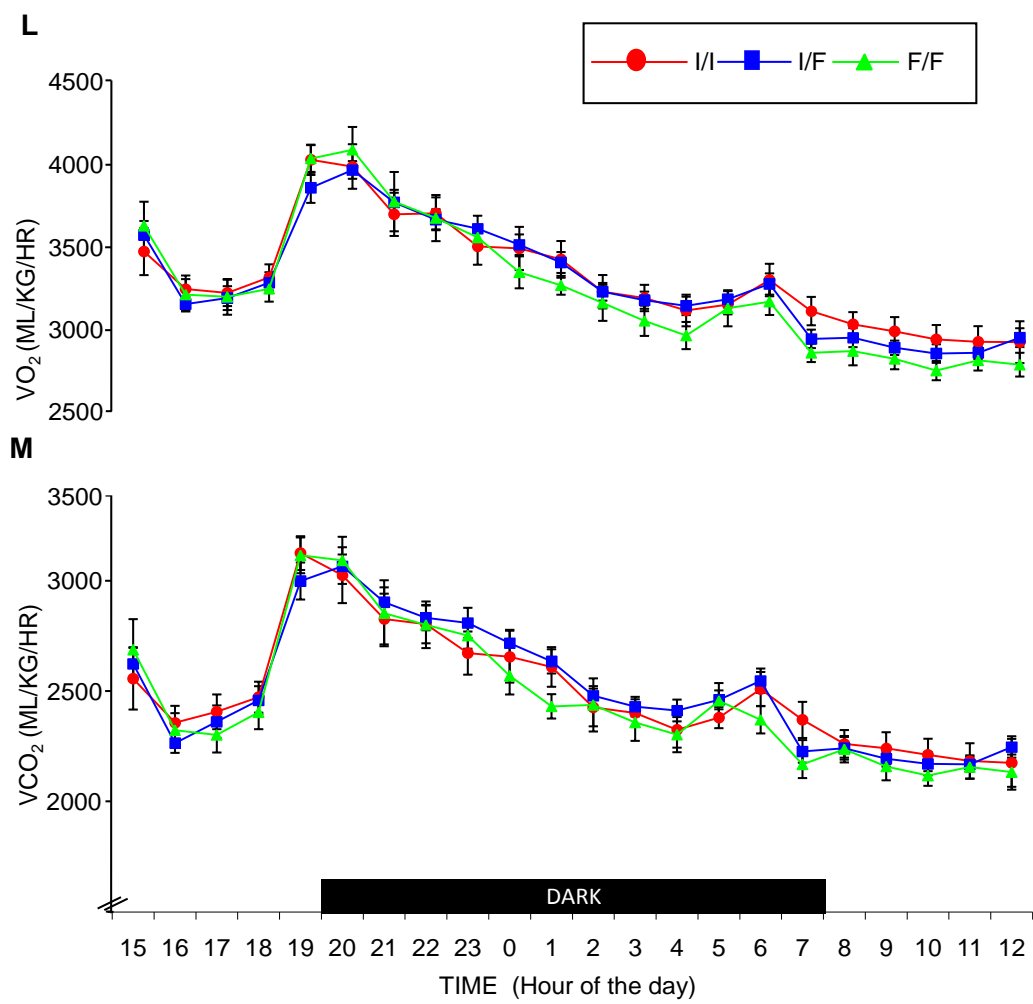

Supplement: pgen.1000599.s008.pdf [file pgen.1000599.s008.pdf]
